# Supplementary material
Source: Springer Nature journal article supplement (https://www.springermedizin.de/resource/supplementary/12889_2014_6920_MOESM3_ESM.pdf/9499300)

Favors  
Non-Contingency Management

Favors  
Contingency Management

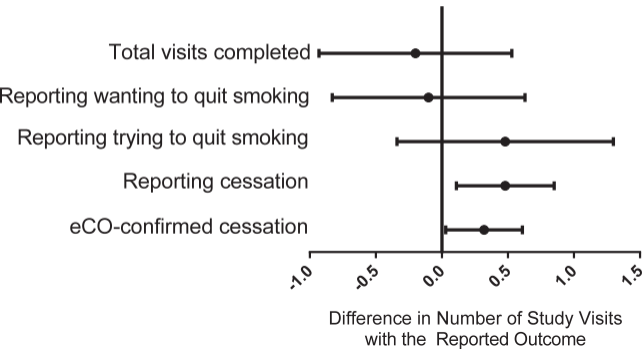

Supplement: MOESM3 [file 9499300]
